1 **TITLE:** PCNA monoubiquitination is regulated by diffusion of Rad6/Rad18 complexes along  
2 RPA filaments

3 **AUTHORS:** Mingjie Li<sup>1</sup>, Bhaswati Sengupta<sup>1</sup>, Stephen J. Benkovic, Tae Hee Lee<sup>2</sup>, and Mark  
4 Hedglin<sup>2</sup>

5 <sup>1</sup>Authors made equal contributions

6 <sup>2</sup>Corresponding authors

7 **AFFILIATIONS:**<sup>1</sup> The Pennsylvania State University, Department of Chemistry, University  
8 Park PA, 16802

9 **CONTACT INFORMATION:**

10 Mark Hedglin: (Corresponding Author): [muh218@psu.edu](mailto:muh218@psu.edu)

11 Tae Hee Lee: [txl18@psu.edu](mailto:txl18@psu.edu)

12 Stephen J. Benkovic: [sjb1@psu.edu](mailto:sjb1@psu.edu)

13 Mingjie Li: [mjl6274@psu.edu](mailto:mjl6274@psu.edu)

14 Bhaswati Sengupta: [bus739@psu.edu](mailto:bus739@psu.edu)

15

16

17

18

19

20

21

22

23

24 **ABSTRACT:** Translesion DNA synthesis (TLS) enables DNA replication through damaging  
25 modifications to template DNA and requires monoubiquitination of the PCNA sliding clamp by  
26 the Rad6/Rad18 complex. This posttranslational modification is critical to cell survival following  
27 exposure to DNA damaging agents and is tightly regulated to restrict TLS to damaged DNA.  
28 RPA, the major single strand DNA (ssDNA) binding protein, forms filaments on ssDNA  
29 exposed at TLS sites and plays critical yet undefined roles in regulating PCNA  
30 monoubiquitination. Here, we utilize kinetic assays and single molecule FRET microscopy to  
31 monitor PCNA monoubiquitination and Rad6/Rad18 complex dynamics on RPA filaments,  
32 respectively. Results reveal that a Rad6/Rad18 complex is recruited to an RPA filament via  
33 Rad18•RPA interactions and randomly translocates along the filament. These translocations  
34 promote productive interactions between the Rad6/Rad18 complex and the resident PCNA,  
35 significantly enhancing monoubiquitination. These results illuminate critical roles of RPA in the  
36 specificity and efficiency of PCNA monoubiquitination.

## 37 **INTRODUCTION**

38 The B-family DNA polymerases (pols)  $\epsilon$  and  $\delta$  replicate the majority of the human genome  
39 and achieve optimal processivity by anchoring to PCNA sliding clamps encircling  
40 primer/template (P/T) junctions<sup>1</sup>. These “replicative” pols have very stringent polymerase  
41 domains and 3' to 5' exonuclease (“proofreading”) domains that collectively ensure accurate  
42 replication of native template bases during S-phase of the cell cycle. However, DNA is  
43 continuously damaged by covalent modifications from reactive metabolites and environmental  
44 mutagens, such as ultraviolet radiation (UVR), and the replicative pols cannot accommodate  
45 damaged template bases (i.e. lesions). Consequently, primer extension by these pols stalls upon  
46 encountering a lesion, leading to persistent exposure of the template strand downstream of the

47 lesion. At UVR-induced lesions, the exposed templates range in length from 150 nt to 1250 nt,  
48 with the latter accounting for 65%<sup>2,3</sup>. RPA immediately coats the exposed templates (1 RPA/30 ±  
49 2 nt)<sup>4-6</sup>, forming elongated and persistent RPA filaments that protect the underlying ssDNA from  
50 degradation, prevents formation of alternative DNA structures<sup>7</sup>, and blocks diffusion of PCNA  
51 along the damaged template<sup>8-10</sup>. Failure to restart primer extension on damaged templates often  
52 results in double-strand breaks that may lead to gross chromosomal rearrangements (GCRs),  
53 cell-cycle arrest, and cell death. These stalling events may be overcome by translesion DNA  
54 synthesis (TLS) where specialized TLS pols bind the resident PCNA and extend the stalled  
55 primer across and beyond the DNA lesion, allowing DNA synthesis by a replicative pol to  
56 resume downstream of the lesion<sup>7</sup>. Characterized by a more “open” DNA polymerase active site  
57 and the lack of an associated proofreading activity, a single TLS pol can accommodate multiple  
58 DNA lesions, albeit with varying fidelities<sup>11</sup>. Hence, tight regulation is required to limit the  
59 frequency and extent of TLS.

60 In humans, TLS requires the covalent attachment of single ubiquitin moieties (i.e.  
61 monoubiquitination) to lysine residues K164 of PCNA sliding clamps encircling stalled P/T  
62 junctions<sup>12</sup>. This critical posttranslational modification (PTM) is fully conserved in eukaryotes  
63 and catalyzed by a complex comprised of Rad6 and Rad18 proteins. The former is an E2  
64 ubiquitin conjugating enzyme that covalently attaches a ubiquitin to PCNA and the latter is a  
65 RING E3 ubiquitin ligase that delivers Rad6 to a PCNA target<sup>13</sup>. PCNA monoubiquitination  
66 contributes to cell survival following exposure to DNA-damaging agents such as UVR and,  
67 hence, must be tightly-regulated as dysfunction can selectively propagate cells with increased  
68 mutagenesis due to aberrant TLS<sup>7,13</sup>. Currently, it is unclear how the activity of the Rad6/Rad18  
69 complex is regulated, particularly regarding the roles of RPA. Recent studies revealed that

70 Rad6/Rad18 complexes directly interact (via Rad18) with RPA on ssDNA and this non-specific  
71 interaction is required for PCNA monoubiquitination<sup>10,14,15</sup>. A pressing issue that has remained  
72 unresolved is the functional role(s) of non-specific Rad18•RPA interactions in PCNA  
73 monoubiquitination. To investigate this, we utilized transient-state kinetic studies and single  
74 molecule FRET (smFRET) TIRF microscopy to directly monitor PCNA monoubiquitination and  
75 the dynamics of Rad6/Rad18 complexes on RPA filaments, respectively. Results from thorough  
76 experiments reveal that a Rad6/Rad18 complex is directly recruited to an RPA filament (via  
77 Rad18•RPA interactions) and then randomly translocates along the filament by one-dimensional,  
78 thermal-driven diffusion. These translocations promote productive interactions between the  
79 Rad6/Rad18 complex and the resident PCNA, significantly enhancing monoubiquitination.  
80 These results illuminate critical roles of RPA in the specificity and efficiency of PCNA  
81 monoubiquitination.

## 82 **RESULTS**

83 **Monoubiquitination of PCNA encircling a P/T junction is promoted by the adjacent RPA**  
84 **filament.** During a catalytic cycle (**Fig. 1A**), a Rad6/Rad18 complex charged with ubiquitin must  
85 first locate and engage its target substrate in a productive complex. The target substrate (S) is a  
86 PCNA encircling a P/T junction and is referred to herein as simply “loaded PCNA”. In the  
87 subsequent chemical step, the Rad6/Rad18 complex covalently attaches the associated ubiquitin  
88 to the engaged target, forming product. The apo Rad6/Rad18 complex devoid of ubiquitin then  
89 disengages from the product and turns over. To investigate the effect of non-specific  
90 Rad18•RPA interactions on catalysis, we monitored the transient-state kinetics of PCNA  
91 monoubiquitination on DNA that mimics stalled P/T junctions (**Fig. 1B**). The duplex regions are  
92 identical and the total lengths of the poly(dT) ssDNA regions are either 33 or 171 nt, which

93 accommodates 1 and ~6 RPA molecules, respectively<sup>4-6</sup>. All experiments were carried out such  
 94 that the concentrations of excess RPA are identical to account for any effects of “free” RPA in  
 95 solution on PCNA monoubiquitination<sup>10</sup>. Charged Rad6/Rad18 is limiting, high concentrations  
 96 of loaded PCNA are utilized, and only  $5.53 \pm 1.05\%$  of the reactions are monitored. Under these  
 97 conditions, double binding events are very rare ( $< 0.15\%$ ), the pre-charged Rad6/Rad18  
 98 complexes may saturate with substrate ( $k_{on}[S]$ ) prior to the chemical step ( $k_{chem}$ ), and product  
 99 release ( $k_{release}$ ) is irreversible (**Fig. 1A**). For all conditions analyzed (**Fig. 1B**), products  
 100 accumulate during an initial burst of enzyme activity (i.e., burst phase) and then increase at a  
 101 slower, constant rate (i.e., steady state phase) (**Fig. 1C**). This biphasic behavior indicates that all

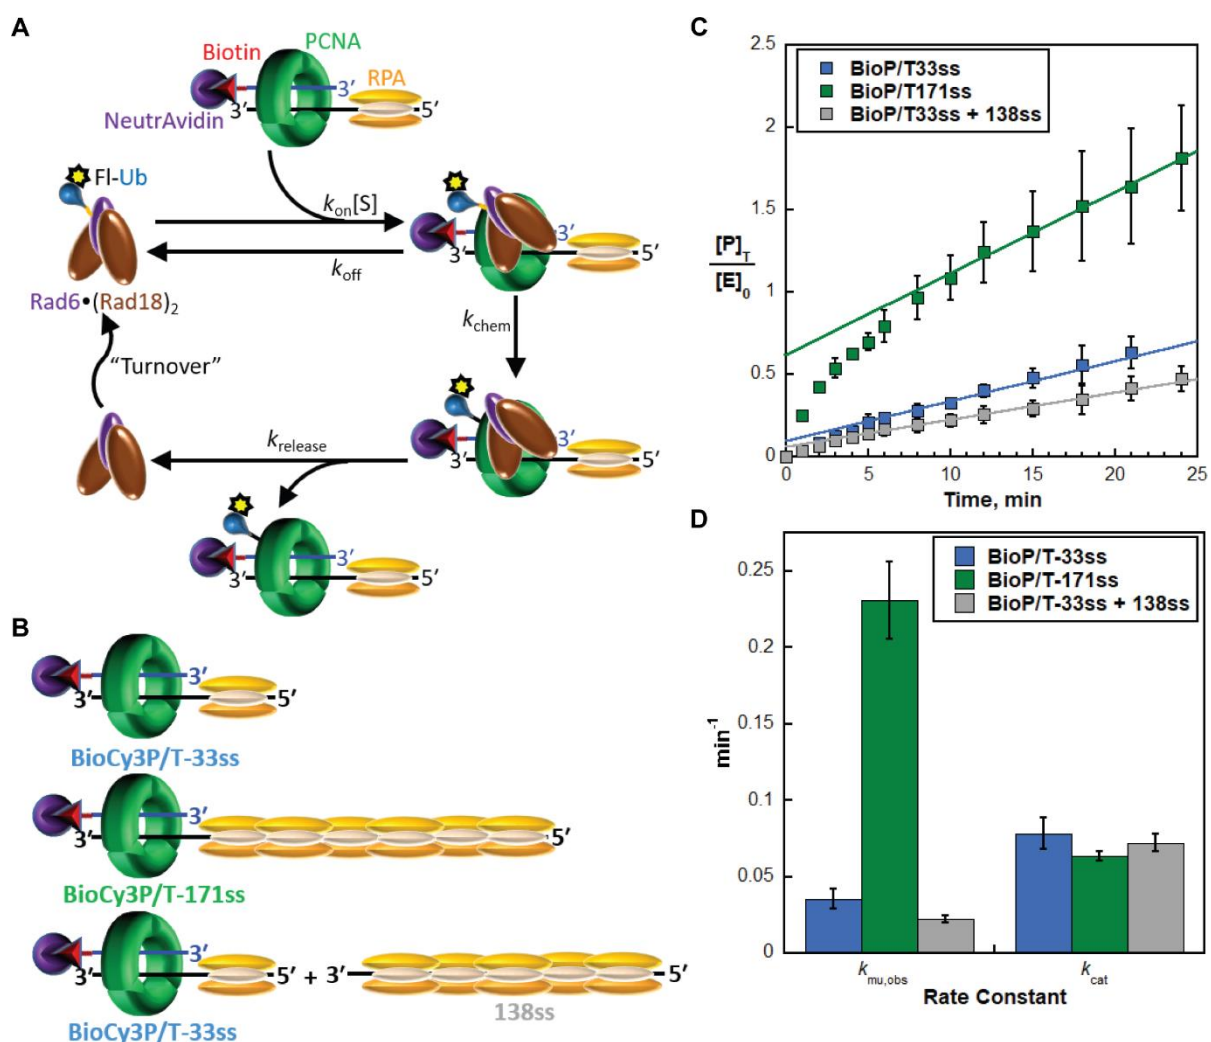

102 steps up to and including monoubiquitination of PCNA ( $k_{on}[S]$  and  $k_{chem}$ ) are comparable to any  
 103 subsequent steps during turnover ( $k_{release}$  and after). Fitting the steady state phases to linear  
 104 regressions yields the amplitudes ( $A_0$ ) for the burst phases and the steady state rates ( $v_{ss}$ ) for  
 105 turnover (reported in **Table 1**). The observed rate constants for PCNA monoubiquitination

|              | Substrate                    | BioP/T-33ss*        | BioP/T-171ss        | BioP/T-33ss + 138ss |
|--------------|------------------------------|---------------------|---------------------|---------------------|
| Experimental | # of RPA bound to ssDNA      | 1                   | 6                   | 6                   |
| Condition    | # of RPA next to PCNA        | 1                   | 6                   | 1                   |
| Kinetic      | $A_0$ , unitless             | $0.0967 \pm 0.0228$ | $0.616 \pm 0.033$   | $0.0548 \pm 0.0081$ |
| Variables    | $v_{ss}$ , $\text{min}^{-1}$ | $0.0243 \pm 0.0015$ | $0.0498 \pm 0.0019$ | $0.0169 \pm 0.0006$ |

106 \* = Reference conditions

107 ( $k_{mu,obs}$ ) and turnover ( $k_{cat}$ ) are calculated from the values for  $v_{ss}$  and  $A_0$  (see **Methods**)<sup>16</sup>.  $k_{cat}$   
 108 reflects the release of product, re-charging of the apo Rad6/Rad18 complex with ubiquitin, or a  
 109 combination of both steps (**Fig. 1A**). The products (monoubiquitinated PCNA) and apo  
 110 Rad6/Rad18 complexes are identical for all conditions. Thus, it is expected that  $k_{cat}$  remains  
 111 constant.

112 A single RPA molecule resides next to a PCNA encircling the BioP/T-33ss DNA (**Fig. 1B**).  
 113 Thus, the target (PCNA) and non-specific binding sites (RPA) are equally abundant on the P/T  
 114 DNA and a Rad6/Rad18 complex has an equal probability of binding either from solution. For  
 115 this reference condition  $k_{mu,obs} = 0.231 \pm 0.025 \text{ min}^{-1}$  and  $k_{cat} = 0.0634 \pm 0.0029 \text{ min}^{-1}$ . On the  
 116 BioP/T-171ss DNA (**Fig. 1B**), the number of RPA molecules residing next to loaded PCNA is  
 117 increased to 6. Here, a Rad6/Rad18 complex is six times more likely to initially engage a non-  
 118 specific site along the RPA filament rather than the loaded PCNA target. In other words, a  
 119 Rad6/Rad18 complex is first localized/recruited to the RPA filament before engaging loaded  
 120 PCNA and catalyzing monoubiquitination<sup>14</sup>. As observed in **Fig. 1D**,  $k_{mu,obs}$  is stimulated by a  
 121 factor of  $6.55 \pm 0.03$  relative to the reference condition but  $k_{cat}$  is unaffected. The latter supports

122 the validity of the approach.  $k_{\text{mu,obs}}$  is dependent on formation of the productive complex ( $k_{\text{on}}[\text{S}]$ )  
123 and the chemical step ( $k_{\text{chem}}$ ) (**Fig. 1A**). The concentration of the target substrate ( $[\text{S}]$ ) and  $k_{\text{chem}}$   
124 are identical for both DNAs as the number of RPA molecules residing next to the P/T junctions  
125 has no effect on the amount of loaded PCNA or its orientation on DNA (**Supplementary Fig.**  
126 **S3**)<sup>10</sup>. This suggests that  $k_{\text{mu,obs}}$  is rate-limited by  $k_{\text{on}}$  and, hence, overabundant non-specific sites  
127 (i.e., an RPA filament) adjacent to a loaded PCNA target stimulate  $k_{\text{mu,obs}}$  by increasing  $k_{\text{on}}$ . A  
128 near stoichiometric increase in  $k_{\text{mu,obs}}$  (6.55-fold) with the 6-fold overabundance of RPA  
129 molecules also supports this conclusion. To confirm this further, we repeated the experiments by  
130 separating the RPA filament from the P/T DNA (BioP/T-33ss + 138ss, **Fig. 1B**). Here, the  
131 loaded PCNA (on the BioP/T-33ss) and the detached RPA filament (on the 138ss) are  
132 stoichiometric. Hence, the number of RPA molecules bound to ssDNA is increased from one to  
133 six compared to the reference condition but still only a single RPA molecule resides next to a  
134 PCNA. As observed in **Fig. 1D**, the significant stimulation of  $k_{\text{mu,obs}}$  on the BioP/T-171ss DNA  
135 disappears when the RPA filament is not physically connected to the P/T junction encircled by  
136 PCNA. Again,  $k_{\text{cat}}$  remains constant, confirming the validity of the experimental approach  
137 (**Figure 1D**). Altogether, the results presented thus far indicate that recruitment of a Rad6/Rad18  
138 complex to an RPA filament adjacent to loaded PCNA stimulates monoubiquitination ( $k_{\text{mu,obs}}$ ) by  
139 promoting formation of a productive complex ( $k_{\text{on}}$ ).

140 **Rad6/Rad18 complexes diffuse randomly along RPA filaments.** In assays carried out with the  
141 BioP/T-171ss DNA, a Rad6/Rad18 complex in solution most likely engages a non-specific site  
142 along the RPA filament that is separated from the loaded PCNA target by one or more  
143 intervening RPA molecules. This recruitment significantly enhances PCNA monoubiquitination  
144 ( $k_{\text{mu,obs}}$ ) by promoting formation of the productive complex ( $k_{\text{on}}$ ) (**Fig. 1**). For catalysis to occur

145 after recruitment, the engaged Rad6/Rad18 complex must transfer from a distal, non-specific site  
146 along the RPA filament to the PCNA target and the RPA filament must provide a pathway for  
147 transfer. A possible mechanism is direct transfer via ssDNA looping. However, RPA filaments  
148 linearize the underlying ssDNA in a rigid rod type structure by engaging the ssDNA in an  
149 elongated manner that extends the bound sequence and increases its bending rigidity 2 – 3  
150 fold<sup>17,18</sup>. Alternatively, a Rad6/Rad18 complex may translocate along the RPA filament by  
151 random, thermal-driven diffusion. In other words, a Rad6/Rad18 complex diffuses towards and  
152 away from loaded PCNA during each engagement with the adjacent RPA filament. Such  
153 movements promote formation of the productive complex ( $k_{on}$ ) by decreasing the time to locate a  
154 PCNA target and/or permitting multiple encounters with a loaded PCNA target during each  
155 interaction with a DNA. To directly observe diffusion of Rad6/Rad18 complexes, we  
156 investigated the dynamics of Rad6/Rad18 complexes on RPA filaments by smFRET TIRF  
157 microscopy (**Fig. 2A**). The P/T DNA (BioCy3P/T-70ss, **Supplementary Fig. 1**) contains a biotin  
158 tag at the blunt duplex end, a Cy3 dye at the P/T junction, and accommodates two RPA  
159 molecules on the ssDNA<sup>4-6</sup>. The ssDNA is saturated with RPA and extended into an elongated,  
160 rigid filament<sup>19</sup>. Rad6 was first labeled with a single, N-terminal Cy5 dye (**Supplementary Fig.**  
161 **4**) and then re-constituted with Rad18 to form the Rad6/Rad18 complex<sup>20</sup>. In this setup, smFRET  
162 occurs when Cy5-Rad6 (FRET acceptor) is in close proximity to the Cy3 dye (FRET donor) at  
163 the P/T junction. smFRET is only observed (i.e.,  $t_{on}$ ) when both Rad18 and RPA are included  
164 (**Fig. 2B**); smFRET events are not detected during ~5520 minutes of total observation when



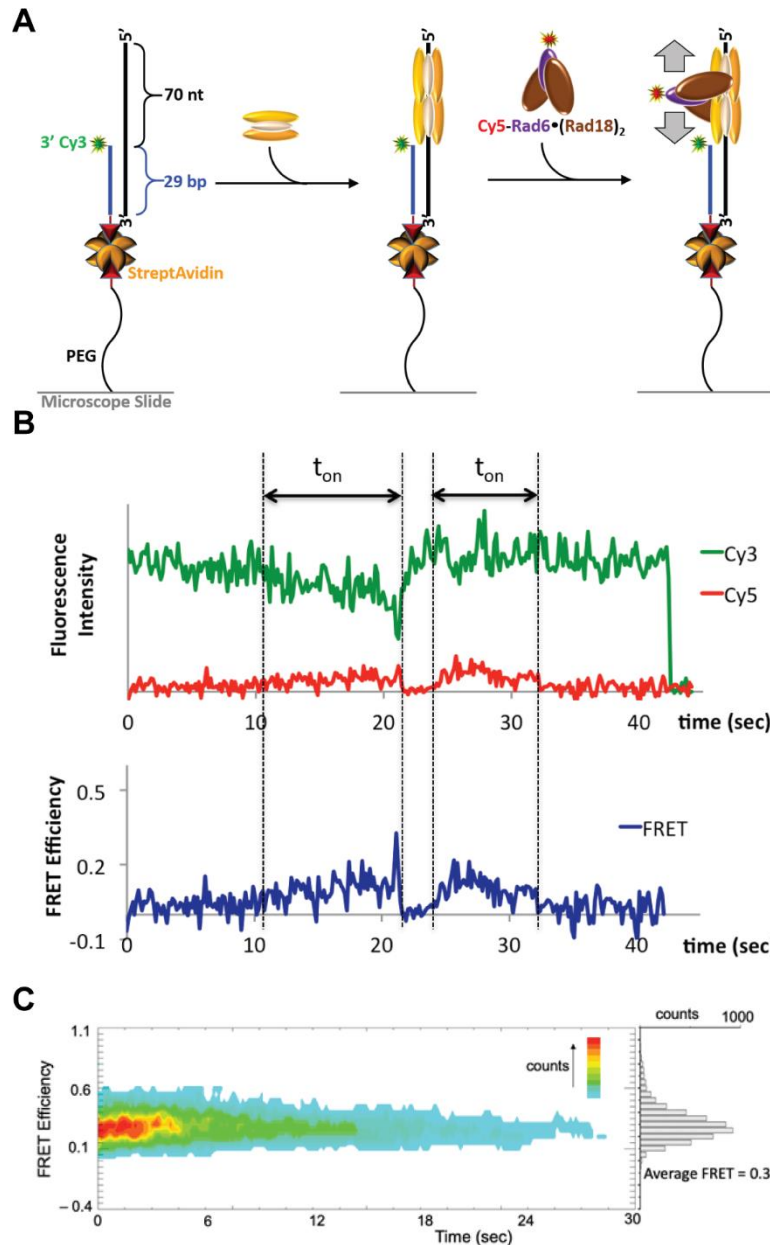

either Rad18 or RPA are omitted. Altogether, this confirms that; 1) Rad18 functionally interacts with Cy5-Rad6 in a manner that directs Cy5-Rad6 to the vicinity of the P/T junction<sup>13</sup> and; 2) the Rad6/Rad18 complex has exceptionally weak affinity for naked ssDNA and, hence, is directly recruited to DNA by RPA filaments<sup>10,14</sup>. Next, we analyzed the smFRET trajectories.

As depicted in the sample smFRET trajectory (**Fig. 2B**), the efficiencies during  $t_{on}$  rapidly fluctuate with time, lacking defined, stable conformational states. Such behavior is consistent with the

182 translocation of a Cy5-Rad6/Rad18 complex towards and away from the Cy3-P/T junction via  
 183 diffusion along the RPA filament. Alternative explanations are that a Cy5-Rad6/Rad18 complex  
 184 is stably bound to a position on the RPA filament and the fluctuations arise due to the  
 185 conformational dynamics of either the P/T junction or the engaged RPA molecules that enable  
 186 contact between the FRET dyes. However, the conformational dynamics of DNA junctions are  
 187 very fast and average out during the measurements with our signal integration time of 150

188 ms<sup>21,22</sup>. Also, the average dwell times ( $t_{on}$ ) of RPA DNA-binding domains (DBD) that undergo  
189 microscopic dissociation/re-association on ssDNA range from 300 ms – 1 s and such events  
190 would be clearly visible with the time resolution of the current experiments<sup>23</sup>. Although it cannot  
191 be ruled out that Rad6/Rad18 complexes affect these microscopic dissociation/re-association  
192 events, defined conformational states are not observed in the smFRET efficiencies (**Fig. 2B**).  
193 Altogether, this suggests that the fluctuations of smFRET efficiencies during  $t_{on}$  reflect the  
194 translocation of a Rad6/Rad18 complex towards and away from the P/T junction via diffusion  
195 along the RPA filament. Next, we investigated the directionality and speed of Rad6/Rad18  
196 diffusion.

197 The 88 detectable smFRET events from the collective time trajectories were synchronized at  
198 the starting points of the  $t_{on}$  windows and overlaid (**Fig. 2C**, left). Histograms of the smFRET  
199 efficiencies observed during the  $t_{on}$  windows were constructed to show the distribution of the  
200 FRET efficiency (**Fig. 2C**, right). The average FRET efficiency calculated from the distribution  
201 is 0.30 and the FRET efficiency fluctuates randomly about this value with no sign of discrete  
202 FRET states. Together, this indicates that Rad6/Rad18 complexes diffuse randomly along the  
203 RPA filament, encountering the P/T junction multiple times during each binding interaction, in  
204 accordance with the proposed model. The changes in FRET efficiencies between two points  
205 separated by 3.45 ~ 5.4 sec ( $n = 55\sim 174$ ) were utilized to calculate the mean squared  
206 displacements (MSD) using a Förster radius of 5.4 nm for Cy3/Cy5<sup>24</sup>. Shorter  $t_{on}$  windows were  
207 removed from the analysis because the FRET dynamics within a short time window are  
208 dominated by noise. Longer  $t_{on}$  windows were also removed from the analysis because the  
209 sample size with longer time windows becomes too small. We found the analysis window  
210 resulting in the highest  $R^2$  value of the fitting. MSDs were plotted as a function of diffusion time

211 (t) and fit to a linear regression,  $MSD = 2Dt$ , where D represents the 1D diffusion coefficient.  
212 This yields a low estimate for a 1D diffusion coefficient of  $0.11 \pm 0.004 \text{ nm}^2\text{s}^{-1}$  ( $R^2 = 0.80$ ).

213 Collectively, the results presented in **Fig. 2** confirm that Rad6/Rad18 complexes are directly  
214 recruited to the vicinity of P/T junctions by the adjacent RPA filaments<sup>10,14,15</sup> and reveal that  
215 Rad6/Rad18 complexes randomly diffuse along RPA filaments. These behaviors collectively  
216 enhance the catalytic activity of Rad6/Rad18 complexes by promoting formation of productive  
217 complexes ( $k_{on}$ ) with PCNA encircling P/T junctions (**Fig. 1**). These unforeseen results  
218 illuminate the undefined roles of Rad18•RPA interactions in regulating PCNA  
219 monoubiquitination, as discussed below.

## 220 **Discussion**

221 Recent studies revealed that Rad6/Rad18 complexes directly interact (via Rad18) with RPA  
222 on ssDNA and these non-specific interactions are required for PCNA monoubiquitination<sup>10,14,15</sup>.  
223 A pressing issue that has remained unresolved is the functional role(s) of non-specific  
224 Rad18•RPA interactions in PCNA monoubiquitination. In the present study, we utilized  
225 transient-state kinetic studies and single molecule FRET (smFRET) TIRF microscopy to directly  
226 monitor PCNA monoubiquitination and RPA•Rad18 interactions on ssDNA, respectively.  
227 Results from thorough experiments revealed that; 1) Rad6/Rad18 complexes translocate along  
228 RPA filaments by random, thermal-driven diffusion, and; 2) these translocations significantly  
229 enhance monoubiquitination of PCNA encircling distal P/T junctions. These results reveal a  
230 catalytic mechanism that is unique to the Rad6/Rad18 complex among PCNA-modifying  
231 enzymes and, to our knowledge, the first example of ATP-independent translocation of a protein  
232 complex along a protein filament. Furthermore, this unique mechanism accounts for the many  
233 challenges that arise *in vivo*, namely selectivity/specificity and efficiency.

234 Monoubiquitination of PCNA elicits DNA synthesis by error-prone TLS pols and, hence,  
235 must be restricted to PCNA encircling P/T junctions stalled at DNA lesions, such as those  
236 generated by UVR exposure. UVR fluences similar to what an individual experiences from one  
237 hour of mid-day sun generate 1.6 to 2.2 million lesions in a human cell, with the vast majority  
238 (67 – 83%) undergoing very slow repair and persisting into S-phase<sup>25,26</sup>. However, DNA  
239 replication in a human cell emanates from 13 to 22 million P/T junctions, each encircled by  
240 PCNA. Thus, very few ( $\leq 10\%$ ) loaded PCNA clamps will ever encounter and subsequently  
241 idle at a UVR-induced lesion under physiologically-relevant conditions<sup>25,27,28</sup>. So, how is  
242 Rad6/Rad18 activity restricted to a such a small minority of loaded PCNA clamps?  
243 Compounding this issue is the relative abundance of Rad6/Rad18 complexes. ~50 proteins  
244 interact with loaded PCNA during S-phase in human cells and many are substantially enriched  
245 (as high as ~80-fold) at P/T junctions stalled at UVR-induced lesions<sup>29</sup>. However, the abundance  
246 of Rad6/Rad18 complexes is maintained at a low level ( $\leq \sim 795$  /cell) and does not change  
247 following UVR exposure<sup>30,31</sup>. How can Rad6/Rad18 complexes effectively compete with the vast  
248 overabundance of competitive PCNA-binding proteins in human cells<sup>32</sup>? The present study  
249 along with previous work from our group and others suggests that selectivity and efficiency of  
250 PCNA monoubiquitination is achieved through non-specific Rad18•RPA interactions. On native  
251 DNA templates, RPA filaments adjacent to progressing P/T junctions are short and transient<sup>33</sup>  
252 due to the minimal exposure of native ssDNA templates<sup>7</sup> and their rapid conversion to double-  
253 stranded DNA duplexes by the replicative pols  $\epsilon$  and  $\delta$  (**Fig. 3**, left)<sup>34</sup>. Here, Rad18•RPA

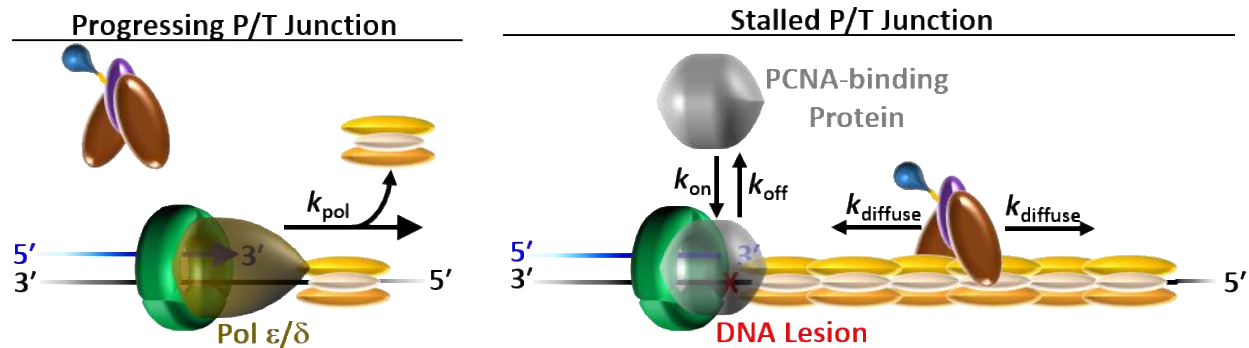

254 interactions on ssDNA are prohibited and Rad6/Rad18 complexes must engage loaded PCNA  
255 directly from solution. These events are inhibited *in vivo*<sup>35</sup>, likely by the continuous, rapid  
256 movement of PCNA engaged with replicating DNA polymerases<sup>10</sup> and the vast overabundance  
257 of competitive PCNA-binding proteins in human cells<sup>29-32</sup>. In support of this, Rad18 is diffusely  
258 distributed throughout the nucleus during S-phase in mock UVR-treated human cells<sup>35</sup> and  
259 overexpression of Rad18 is required for PCNA monoubiquitination under these conditions<sup>14</sup>. In  
260 stark contrast, P/T junctions stalled at UVR-induced lesions generate RPA filaments that range in  
261 length from 5 - 42 RPA molecules<sup>2-6</sup> and persist for > 8h<sup>36</sup>. The unique properties of these RPA  
262 filaments promote Rad18•RPA interactions and selectively localize Rad6/Rad18 complexes to  
263 rare target sites independently of PCNA binding (**Fig. 3**, right). This avoids a biased competition  
264 with most cellular proteins that must localize via direct binding to loaded PCNA<sup>14</sup>. Given the  
265 relative low abundance of Rad6/Rad18 complexes<sup>30,31</sup> and the extended lengths of RPA  
266 filaments generated at UVR-induced lesions<sup>2-6</sup>, a single Rad6/Rad18 complex is initially  
267 recruited to a random position along an RPA filament that is distal to the loaded PCNA target.  
268 Once engaged, the Rad6/Rad18 complex translocates randomly along the RPA filament by  
269 thermal-driven diffusion. In other words, the non-specific binding interactions with RPA  
270 molecules are correlated, allowing a Rad6/Rad18 complex to engage many RPA molecules  
271 during each encounter with an RPA filament. A correlated search of non-specific sites for a  
272 target site is more efficient than a non-correlated search<sup>37</sup>. Furthermore, as the resident PCNA is

273 being stochastically sampled by the nucleoplasmic pool of PCNA-binding proteins, diffusion of  
274 the Rad6/Rad18 complex along the adjacent RPA filament selectively elevates the relative  
275 frequency of collisions between the loaded PCNA target and the Rad6/Rad18 complex.  
276 Together, this promotes monoubiquitination of PCNA encircling stalled P/T junction despite the  
277 relatively low abundance of Rad6/Rad18 complexes<sup>30,31</sup>.

278 In the current smFRET setup (**Fig. 2A**), dissociation of a Rad6/Rad18 complex from an RPA  
279 filament cannot be defined. Thus, it is unknown how far a Rad6/Rad18 complex can diffuse  
280 along an RPA filament before dissociating into solution. Extensive diffusion would ensure  
281 monoubiquitination of PCNA encircling a stalled P/T junction regardless of where the  
282 Rad6/Rad18 complex initially engaged the adjacent RPA filament. However, this mechanism  
283 would likely be impacted by collisions with other proteins bound to the RPA filament, resulting  
284 in local trapping of the Rad6/Rad18 complex on small segments of the RPA filament<sup>37-40</sup>. Thus,  
285 we envision that a Rad6/Rad18 complex diffuses along short segments of the RPA filament (up  
286 to 6 RPA molecules, **Fig. 1**) before dissociating into solution. Given the wide distribution of  
287 UVR-induced lesions after exposure to physiologically-relevant fluences (1 lesion every 3 – 4  
288 kilobases) and the high, local concentration of RPA molecules on stalled P/T junctions, the  
289 disengaged Rad6/Rad18 complex likely re-associates with the same RPA filament at a random  
290 position. In this model, intermittent dissociation events between diffusive translocations allow a  
291 Rad6/Rad18 complex to escape local trapping and bypass proteins bound to the RPA filament.  
292 However, short diffusion lengths require that a Rad6/Rad18 complex must ultimately engage the  
293 RPA filament at a position near the stalled P/T junction in order to monoubiquitinate the resident  
294 PCNA. This proposed model is the focus of ongoing studies.

295 **Methods**

296 *Oligonucleotides.* DNA constructs were synthesized by Integrated DNA Technologies  
297 (Coralville, IA) and purified on denaturing polyacrylamide gels. Concentrations of unlabeled  
298 DNAs were determined from the absorbance at 260 nm using the calculated extinction  
299 coefficients. For DNA labeled with a cyanine dye, concentrations were determined from the  
300 absorbance at 550 nm (for Cy3) or 650 nm (for Cy5) using the extinction coefficient of the  
301 respective dye. Primer/Template (P/T) DNA substrates were annealed by mixing the primer and  
302 equimolar amounts of complementary templates strand in 1X Annealing Buffer (10 mM Tris-  
303 HCl, pH 8.0, 100 mM NaCl, 1 mM EDTA), heated to 95 °C for 5 min, and allowed to slowly  
304 cool to room temperature. All DNA substrates utilized in the present study are depicted in  
305 **Supplementary Fig. 1.**

306 *Recombinant human proteins.* Wild type-PCNA, a site-specifically labeled Cy5-PCNA, Rad6,  
307 Rad6/Rad18, RFC, RPA, Ube1, and fluorescein-labeled ubiquitin (Fl-Ub) were expressed and  
308 purified as previously described<sup>1-5</sup>. The concentration of the purified Rad6/Rad18 complex was  
309 determined from the extinction coefficient ( $\epsilon_{280} = 68570 \text{ M}^{-1}\text{cm}^{-1}$ ) assuming a stoichiometry of  
310  $\text{Rad6} \bullet (\text{Rad18})_2$ <sup>41</sup> and the concentration of Rad6 within the complex was confirmed by Bradford  
311 assay using BSA (VWR) as a standard. The concentration of active RPA was confirmed as  
312 previously described (**Supplementary Fig. 2**)<sup>17</sup>. The plasmid (pET28-NHis-SUMO-Rad18) for  
313 the expression of Rad18 was a generous gift from Dr. Jun Huang (Life Sciences Institute,  
314 Zhejiang University, Hangzhou, China)<sup>42</sup>. Rad18 was expressed in *E. Coli* and purified by via  
315 slight modifications of published protocols (see **Supplementary Information**). Rad18  
316 concentration was determined via Bradford assay using BSA as a standard.

317 *Protein labeling for smFRET measurements.* The N-terminus of Rad6 was labeled with Cy5 (GE  
318 Healthcare). Briefly, the solution of NHS-ester functionalized Cy5 in DMSO was added

319 dropwise under stirring conditions to a solution of Rad6 in 10 mM HEPES, pH 7.5 containing  
320 468 mM NaCl, 2  $\mu$ M ZnCl<sub>2</sub> and 1 mM TCEP. The final protein:dye ratio was 1:1.1 and the  
321 labeling reaction was incubated overnight at 4° C. Labeled Rad6 was separated from free Cy5  
322 dye by dialysis against 10 mM HEPES buffer (pH 7.5) twice. Finally, the solution was  
323 concentrated and washed twice with the storage buffer (10 mM HEPES, pH 7.5, 468 mM NaCl,  
324 2  $\mu$ M ZnCl<sub>2</sub>, 1 mM TCEP) via centrifugal filtration (Amicon, 3kDa MW cutoff) and stored at -  
325 80° C. The labeling efficiency was calculated by dividing the concentration of Cy5 by the  
326 concentration of Rad6. The former is determined from the absorbance at 650 nm using the  
327 extinction coefficient for Cy5. The latter is determined by Bradford assay using unlabeled Rad6  
328 as the standard and correcting for the absorbance of Cy5 at 595 nm ( $\epsilon_{595} = 140,000 \pm 4010 \text{ M}^{-1}$   
329  $\text{cm}^{-1}$ ). On average, each Rad6 contains one Cy5 dye (labeling efficiency =  $1.10 \pm 0.08$   
330 Cy5/Rad6). SDS-PAGE analysis of Cy5-Rad6 indicated a single labeled species  
331 (**Supplementary Fig. 3**). Together, this indicates that Rad6 is uniformly labeled with a single  
332 Cy5 dye/protein.

333 *Ensemble FRET measurements.* All experiments were performed at room temperature ( $23 \pm 2$ ) °C  
334 in 1X ubiquitination buffer (25 mM HEPES, 125 mM KOAc, 10 mM Mg(OAc)<sub>2</sub>) supplemented  
335 with 1 mM TCEP. The ionic strength was adjusted to 200 mM by the addition of appropriate  
336 amounts of KOAc. First, a solution containing 110 nM of a Cy3-labeled P/T DNA substrate  
337 (**Supplementary Fig. 1**), NeutrAvidin (Thermo Scientific, 440 nM), and ATP (1 mM), was pre-  
338 incubated with excess RPA such that the concentration of free RPA is 550 nM. Cy5-PCNA (100  
339 nM homotrimer) and RFC (100 nM) are sequentially added and retention of PCNA on DNA at  
340 equilibrium is monitored via FRET as described as previously<sup>6,7</sup>.



341 *Ubiquitination Assays.* All ubiquitination assays are performed at room temperature ( $23 \pm 2$  °C)  
342 in 1X ubiquitination assay buffer (25 mM HEPES, pH 7.5, 10 mM Mg(OAc)<sub>2</sub>, 125 mM KOAc)  
343 supplemented with 1 mM TCEP, and the ionic strength is adjusted to physiological (200 mM) by  
344 the addition of appropriate amounts of KOAc. All concentrations indicated below are final (i.e.,  
345 after mixing). Unless indicated otherwise, experiments were performed as described previously  
346 with minor changes<sup>10,32</sup>. In solution A, PCNA (700 nM homotrimer) is preloaded by RFC (700  
347 nM + 0.5 mM ATP) onto a P/T DNA substrate (700 nM + 2.8 μM NeutrAvidin) in the presence  
348 of excess RPA such that the ssDNA is saturated with RPA and the concentration of free RPA is  
349 1.0 μM. Under these conditions, all PCNA is loaded onto the DNA and stabilized<sup>8,9</sup> and, hence,  
350 the concentration of loaded PCNA is 700 nM. In solution B, Rad6/Rad18 (7 nM heterotrimer) is  
351 pre-incubated with Ube1 (14 nM + 0.5 mM ATP) and Fl-Ub (4.55 μM) for 10 minutes. Under  
352 these conditions, all Rad6/Rad18 is charged with ubiquitin<sup>32</sup> and, hence, the concentration of  
353 charged Rad6/Rad18 is 7 nM. Ubiquitination of target proteins is initiated by mixing equal  
354 volumes of solutions A and B. Aliquots are removed at the indicated time points and quenched  
355 1.33-fold into 1X reducing loading buffer (5 mM Tris, pH 6.8, 7.5% glycerol v/v, 0.375% SDS,  
356 0.51 M β-mercaptoethanol, Bromophenol Blue). Under these reducing and denaturing  
357 conditions, only proteins containing covalent isopeptide bonds with ubiquitin are observed. After  
358 all time points are completed, samples are analyzed by fluorescence scanning as described  
359 previously to yield the concentration of monoubiquitinated PCNA clamps ( $[P]_T = [E \bullet P] + [P]$ )<sup>10</sup>.  
360 Data points were divided by the initial concentration of pre-charged Rad6/Rad18 ( $[E]_0 = 7$  nM)  
361 and plotted as function of time. For each condition, the steady state phase is fit to the equation<sup>16</sup>

362 
$$\frac{[P]_T}{[E]_0} = \frac{[E \bullet P] + [P]}{[E]_0} = A_0 + v_{ss}t$$
 where  $v_{ss} = k_{mu,obs}k_{cat} / (k_{mu,obs} + k_{cat})$  and  $A_0 =$

363  $[k_{mu,obs} / (k_{mu,obs} + k_{cat})]^2$ . Values for  $k_{mu,obs}$  and  $k_{cat}$  are calculated from the values for  $A_0$   
364 and  $k_{cat}$  reported in **Table 1**.

365 *smFRET measurements*. Quartz microscope slides (Finkenbeiner, USA) were thoroughly cleaned  
366 as previously described<sup>43</sup> and slide surfaces were coated with polyethyleneglycol (PEG) and  
367 PEG-biotin at a 99:1 ratio. First, the BioCy3P/T-70ss DNA substrate (**Supplementary Fig. 1**)  
368 was immobilized on a microscope slide surface via biotin/streptavidin conjugation and then pre-  
369 incubated with 0.5  $\mu$ M RPA for 10 minutes followed by a wash. Next, a solution containing 10  
370 nM Cy5-Rad6, 20 nM Rad18, 1.6 mM protocatechuic acid (PCA, HWI Pherma Services), 0.16  
371 units/mL protocatechuate-3,4-dioxygenase (PCD, Sigma) and 1 mM trolox (Sigma, MO, USA)  
372 was injected. After a 10 minute incubation to deplete oxygen, two-color smFRET measurements  
373 were performed using a prism-coupled total internal reflection fluorescence (TIRF) microscope  
374 system that is based on a Nikon TE2000 microscope (Nikon, Japan) as previously described<sup>43</sup>.  
375 Briefly, the slide surface was illuminated with a 532 nm laser through a prism mounted on top of  
376 the slide. Fluorescence emission was collected through a water immersion objective lens (Nikon,  
377 Plan Apo, 60x, 1.2 NA) and bifurcated to two different paths to separately image donor (Cy3)  
378 and acceptor (Cy5) signals on an EMCCD camera (Cascade-II, Photometrics). A time-series  
379 stack of fluorescence images with 150 ms signal integration was recorded until ~70% Cy3 spots  
380 are photobleached. Several stacks of images were recorded focusing on different regions of the  
381 slide surface. The intensities of Cy3 emission and corresponding Cy5 emission were obtained  
382 from the stacks of images. The background fluorescence signal after photobleaching was taken  
383 as the zero-fluorescence level and subtracted from the fluorescence signal. From the relative  
384 intensities of Cy3 and Cy5, the FRET efficiencies were estimated with  $I_{Cy5}/(I_{Cy3} + I_{Cy5})$ , where I  
385 is the fluorescence intensity. From the dynamics of the FRET efficiency levels, the time

386 windows of the FRET-on states were defined. We first identified FRET-on events with a 4-frame  
387 average of FRET efficiency  $\geq 0.1$  which was also verified by visual inspection. The first and last  
388 points of each event that show anti-correlated Cy3 and Cy5 intensities were defined as the  
389 starting and ending points of a  $\tau_{on}$  window. We observe a total of 88  $\tau_{on}$  events over 1100 s of the  
390 362250 s total observation time. Under these conditions the probability of observing a double-  
391 binding event is negligible ( $\sim 0.0009\%$ ).

392

393

394

395

396

397

398

399

400

401

402

403

404

405

406

407

408

409 **References**

- 410 1 Hedglin, M., Kumar, R. & Benkovic, S. J. Replication clamps and clamp loaders. *Cold*  
411 *Spring Harb Perspect Biol* **5**, a010165, doi:10.1101/cshperspect.a010165 (2013).
- 412 2 Lehmann, A. R. Postreplication repair of DNA in ultraviolet-irradiated mammalian cells. *J*  
413 *Mol Biol* **66**, 319-337, doi:10.1016/0022-2836(72)90418-4 (1972).
- 414 3 Meneghini, R., Cordeiro-Stone, M. & Schumacher, R. I. Size and frequency of gaps in newly  
415 synthesized DNA of xeroderma pigmentosum human cells irradiated with ultraviolet light.  
416 *Biophys J* **33**, 81-92, doi:10.1016/S0006-3495(81)84873-4 (1981).
- 417 4 Kim, C. & Wold, M. S. Recombinant human replication protein A binds to polynucleotides  
418 with low cooperativity. *Biochemistry* **34**, 2058-2064 (1995).
- 419 5 Kim, C., Paulus, B. F. & Wold, M. S. Interactions of human replication protein A with  
420 oligonucleotides. *Biochemistry* **33**, 14197-14206 (1994).
- 421 6 Kim, C., Snyder, R. O. & Wold, M. S. Binding properties of replication protein A from  
422 human and yeast cells. *Mol Cell Biol* **12**, 3050-3059 (1992).
- 423 7 Hedglin, M. & Benkovic, S. J. Eukaryotic Translesion DNA Synthesis on the Leading and  
424 Lagging Strands: Unique Detours around the Same Obstacle. *Chem Rev* **117**, 7857-7877,  
425 doi:10.1021/acs.chemrev.7b00046 (2017).
- 426 8 Hedglin, M., Aitha, M. & Benkovic, S. J. Monitoring the Retention of Human Proliferating  
427 Cell Nuclear Antigen at Primer/Template Junctions by Proteins That Bind Single-Stranded  
428 DNA. *Biochemistry* **56**, 3415-3421, doi:10.1021/acs.biochem.7b00386 (2017).
- 429 9 Hedglin, M. & Benkovic, S. J. Replication Protein A Prohibits Diffusion of the PCNA  
430 Sliding Clamp along Single-Stranded DNA. *Biochemistry* **56**, 1824-1835,  
431 doi:10.1021/acs.biochem.6b01213 (2017).
- 432 10 Hedglin, M., Aitha, M., Pedley, A. & Benkovic, S. J. Replication protein A dynamically  
433 regulates monoubiquitination of proliferating cell nuclear antigen. *J Biol Chem* **294**, 5157-  
434 5168, doi:10.1074/jbc.RA118.005297 (2019).
- 435 11 Sale, J. E., Lehmann, A. R. & Woodgate, R. Y-family DNA polymerases and their role in  
436 tolerance of cellular DNA damage. *Nat Rev Mol Cell Biol* **13**, 141-152, doi:10.1038/nrm3289  
437 (2012).
- 438 12 Yoon, J. H., Prakash, S. & Prakash, L. Requirement of Rad18 protein for replication through  
439 DNA lesions in mouse and human cells. *Proc Natl Acad Sci U S A* **109**, 7799-7804,  
440 doi:10.1073/pnas.1204105109 (2012).
- 441 13 Hedglin, M. & Benkovic, S. J. Regulation of Rad6/Rad18 Activity During DNA Damage  
442 Tolerance. *Annu Rev Biophys* **44**, 207-228, doi:10.1146/annurev-biophys-060414-033841  
443 (2015).
- 444 14 Davies, A. A., Huttner, D., Daigaku, Y., Chen, S. & Ulrich, H. D. Activation of ubiquitin-  
445 dependent DNA damage bypass is mediated by replication protein a. *Mol Cell* **29**, 625-636,  
446 doi:10.1016/j.molcel.2007.12.016 (2008).
- 447 15 Huttner, D. & Ulrich, H. D. Cooperation of replication protein A with the ubiquitin ligase  
448 Rad18 in DNA damage bypass. *Cell Cycle* **7**, 3629-3633, doi:10.4161/cc.7.23.7166 (2008).
- 449 16 Johnson, K. A. in *The Enzymes* Vol. 20 (ed David S. Sigman) Ch. 1, 1-61 (1992).
- 450 17 Yates, L. A. *et al.* A structural and dynamic model for the assembly of Replication Protein A  
451 on single-stranded DNA. *Nat Commun* **9**, 5447, doi:10.1038/s41467-018-07883-7 (2018).
- 452 18 Chen, J., Le, S., Basu, A., Chazin, W. J. & Yan, J. Mechanochemical regulations of RPA's  
453 binding to ssDNA. *Sci Rep* **5**, 9296, doi:10.1038/srep09296 (2015).

- 454 19 Wang, Q. M. *et al.* Human replication protein A induces dynamic changes in single-stranded  
455 DNA and RNA structures. *J Biol Chem* **294**, 13915-13927, doi:10.1074/jbc.RA119.009737  
456 (2019).
- 457 20 Hibbert, R. G., Huang, A., Boelens, R. & Sixma, T. K. E3 ligase Rad18 promotes  
458 monoubiquitination rather than ubiquitin chain formation by E2 enzyme Rad6. *Proc Natl*  
459 *Acad Sci U S A* **108**, 5590-5595, doi:10.1073/pnas.1017516108 (2011).
- 460 21 Murphy, M. C., Rasnik, I., Cheng, W., Lohman, T. M. & Ha, T. Probing single-stranded  
461 DNA conformational flexibility using fluorescence spectroscopy. *Biophys J* **86**, 2530-2537,  
462 doi:10.1016/S0006-3495(04)74308-8 (2004).
- 463 22 Neupane, K. *et al.* Transition path times for nucleic Acid folding determined from energy-  
464 landscape analysis of single-molecule trajectories. *Phys Rev Lett* **109**, 068102,  
465 doi:10.1103/PhysRevLett.109.068102 (2012).
- 466 23 Pokhrel, N. *et al.* Dynamics and selective remodeling of the DNA-binding domains of RPA.  
467 *Nat Struct Mol Biol* **26**, 129-136, doi:10.1038/s41594-018-0181-y (2019).
- 468 24 Lee, S., Lee, J. & Hohng, S. Single-molecule three-color FRET with both negligible spectral  
469 overlap and long observation time. *PLoS One* **5**, e12270, doi:10.1371/journal.pone.0012270  
470 (2010).
- 471 25 Kemp, M. G. & Sancar, A. DNA excision repair: where do all the dimers go? *Cell Cycle* **11**,  
472 2997-3002, doi:10.4161/cc.21126 (2012).
- 473 26 Niimi, A. *et al.* Regulation of proliferating cell nuclear antigen ubiquitination in mammalian  
474 cells. *Proc Natl Acad Sci U S A* **105**, 16125-16130, doi:10.1073/pnas.0802727105 (2008).
- 475 27 Macheret, M. & Halazonetis, T. D. Intragenic origins due to short G1 phases underlie  
476 oncogene-induced DNA replication stress. *Nature* **555**, 112-116, doi:10.1038/nature25507  
477 (2018).
- 478 28 Balakrishnan, L. & Bambara, R. A. Okazaki fragment metabolism. *Cold Spring Harb*  
479 *Perspect Biol* **5**, 185 - 196, doi:10.1101/cshperspect.a010173 (2013).
- 480 29 Srivastava, M. *et al.* Replisome Dynamics and Their Functional Relevance upon DNA  
481 Damage through the PCNA Interactome. *Cell Rep* **25**, 3869-3883 e3864,  
482 doi:10.1016/j.celrep.2018.11.099 (2018).
- 483 30 Masuyama, S. *et al.* Regulated expression and dynamic changes in subnuclear localization of  
484 mammalian Rad18 under normal and genotoxic conditions. *Genes Cells* **10**, 753-762,  
485 doi:10.1111/j.1365-2443.2005.00874.x (2005).
- 486 31 Beck, M. *et al.* The quantitative proteome of a human cell line. *Mol Syst Biol* **7**, 549,  
487 doi:10.1038/msb.2011.82 (2011).
- 488 32 Li, M., Larsen, L. & Hedglin, M. Rad6/Rad18 Competes with DNA Polymerases  $\epsilon$  and  
489  $\delta$  for PCNA Encircling DNA. *Biochemistry*, doi:10.1021/acs.biochem.9b00938 (2020).
- 490 33 Gourdin, A. M. *et al.* Differential binding kinetics of replication protein A during replication  
491 and the pre- and post-incision steps of nucleotide excision repair. *DNA Repair (Amst)* **24**, 46-  
492 56, doi:10.1016/j.dnarep.2014.09.013 (2014).
- 493 34 Lewis, J. S. *et al.* Tunability of DNA Polymerase Stability during Eukaryotic DNA  
494 Replication. *Mol Cell* **77**, 17-25 e15, doi:10.1016/j.molcel.2019.10.005 (2020).
- 495 35 Watson, N. B. *et al.* RAD18 and associated proteins are immobilized in nuclear foci in  
496 human cells entering S-phase with ultraviolet light-induced damage. *Mutat Res* **648**, 23-31,  
497 doi:10.1016/j.mrfmmm.2008.09.006 (2008).

- 498 36 Diamant, N. *et al.* DNA damage bypass operates in the S and G2 phases of the cell cycle and  
499 exhibits differential mutagenicity. *Nucleic Acids Res* **40**, 170-180, doi:10.1093/nar/gkr596  
500 (2012).
- 501 37 Suter, D. M. Transcription Factors and DNA Play Hide and Seek. *Trends Cell Biol* **30**, 491-  
502 500, doi:10.1016/j.tcb.2020.03.003 (2020).
- 503 38 Marechal, A. & Zou, L. RPA-coated single-stranded DNA as a platform for post-translational  
504 modifications in the DNA damage response. *Cell Res* **25**, 9-23, doi:10.1038/cr.2014.147  
505 (2015).
- 506 39 Marechal, A. *et al.* PRP19 transforms into a sensor of RPA-ssDNA after DNA damage and  
507 drives ATR activation via a ubiquitin-mediated circuitry. *Mol Cell* **53**, 235-246,  
508 doi:10.1016/j.molcel.2013.11.002 (2014).
- 509 40 Yang, X. H. & Zou, L. Dual functions of DNA replication forks in checkpoint signaling and  
510 PCNA ubiquitination. *Cell Cycle* **8**, 191-194, doi:10.4161/cc.8.2.7357 (2009).
- 511 41 Masuda, Y., Suzuki, M., Kawai, H., Suzuki, F. & Kamiya, K. Asymmetric nature of two  
512 subunits of RAD18, a RING-type ubiquitin ligase E3, in the human RAD6A-RAD18 ternary  
513 complex. *Nucleic Acids Res* **40**, 1065-1076, doi:10.1093/nar/gkr805 (2012).
- 514 42 Han, J. *et al.* SIVA1 directs the E3 ubiquitin ligase RAD18 for PCNA monoubiquitination. *J*  
515 *Cell Biol* **205**, 811-827, doi:10.1083/jcb.201311007 (2014).
- 516 43 Lee, J., Crickard, J. B., Reese, J. C. & Lee, T. H. Single-molecule FRET method to  
517 investigate the dynamics of transcription elongation through the nucleosome by RNA  
518 polymerase II. *Methods* **159-160**, 51-58, doi:10.1016/j.ymeth.2019.01.009 (2019).  
519

520 **Acknowledgements.** We would like to thank members of the Hedglin, Lee, and Benkovic labs  
521 for helpful insights, discussion, and critical reading of this manuscript. This work was supported  
522 in part by the NIH (grants RO1 GM123164 to T.H.L. and RO1 GM13307 to S.J.B.)

523 **Author Contributions.** M.H., T.H.L. designed research. M.L. and B.S. performed research.  
524 S.J.B. contributed new reagents. M.H., T.H.L., M.L., and B.S. analyzed data. M.L., B.S., M.H.,  
525 T.H.L. and S.J.B. wrote the paper.

526 **Competing Interests statement:** No conflicts or competing interests declared.

527

528

529

530

531

532

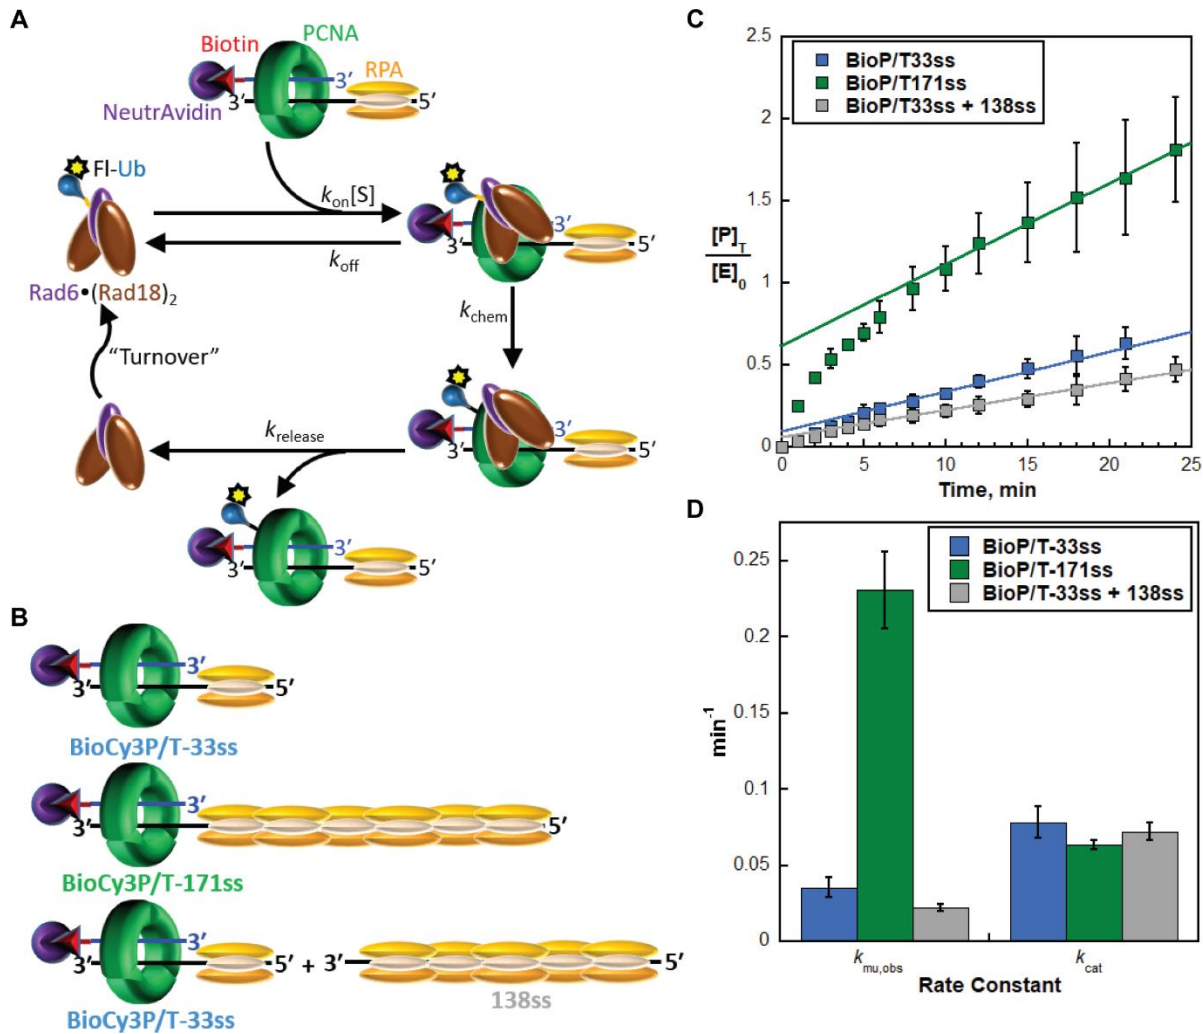

533

534

535

536

537

538

539

540

541 **Figures, Figure Legends, and Tables**

542 **Figure 1. Transient-state kinetic analyses reveal a critical role for RPA in**

543 **monoubiquitination of PCNA by the Rad6/Rad18 complex .** (A) Schematic representation of  
544 the catalytic cycle of a charged Rad6/Rad18 complex and the experiments to monitor PCNA  
545 monoubiquitination. A PCNA is pre-assembled on a BioP/T DNA substrate in the presence of  
546 RPA. Both RPA and the biotin/neutravidin complexes serve to prevent to PCNA from sliding off  
547 the DNA. The Rad6/Rad18 complex charged with fluorescently-labeled ubiquitin is then added  
548 and monoubiquitination of target proteins is monitored over time. (B) Schematic representations  
549 of PCNA assembled onto the BioP/T DNA substrates. (C) Extents of PCNA monoubiquitination.  
550 The concentrations of monoubiquitinated PCNA clamps are divided by the initial concentration  
551 of charged Rad6/Rad18 and plotted as function of time. Data represent the average  $\pm$  S.D. of  
552 three independent experiments. For each condition, the linear phase is fit to a linear regression  
553 that is extrapolated back to the y-axis. The y-intercept and the slope of the fit represent the  
554 amplitude ( $A_0$ ) and the steady state rate ( $v_{ss}$ ), respectively. (D) Kinetic analyses. Values for the  
555 rate constants  $k_{mu,obs}$  (■) and  $k_{cat}$  (◆) are calculated from the values for  $A_0$  and  $v_{ss}$  determined  
556 from panel A (and reported in **Table 1**) and plotted for each condition.  $k_{mu,obs}$  is dependent on the  
557 length of RPA molecules adjacent to the target PCNA.  $k_{cat}$  remains constant.



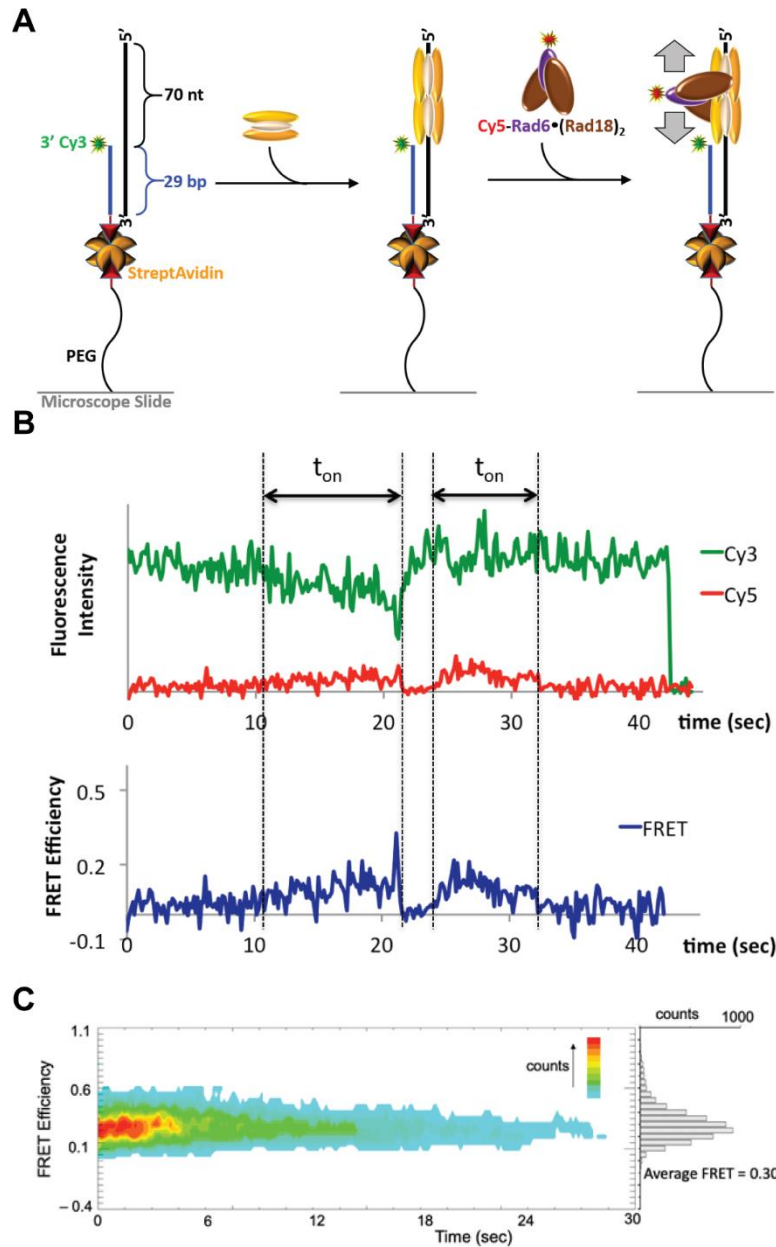

558

559 **Figure 2.** smFRET analyses reveal random diffusion of Rad6/Rad18 complexes on RPA

560 filaments. (A) Experimental schematic to monitor translocation of a Rad6/Rad18 complex along

561 RPA filaments via smFRET. The BioCy3P/T-70ss DNA substrate is immobilized on a

562 microscope slide surface via biotin/streptavidin conjugation and the ssDNA region is saturated

563 with two RPA molecules. Cy5-Rad6/Rad18 is injected and smFRET is monitored over time. (B)

564 An example of a time trajectory shows the fluctuating smFRET efficiency during  $\tau_{on}$ , indicating

565 that a Rad6/Rad18 complex translocates along an RPA filament (right). **(C)** Collective smFRET  
566 efficiency time trajectories ( $n = 88$ ) synchronized at the starting point of smFRET events (i.e.  
567 starting points of the  $\tau_{on}$  windows shown in panel **B**) were overlaid (*Left*). The average smFRET  
568 efficiency (indicated) is calculated from the histogram of the smFRET efficiencies observed  
569 during the  $t_{on}$  windows (*Right*).

570

571

572

573

574

575

576

577

578

579

580

581

582

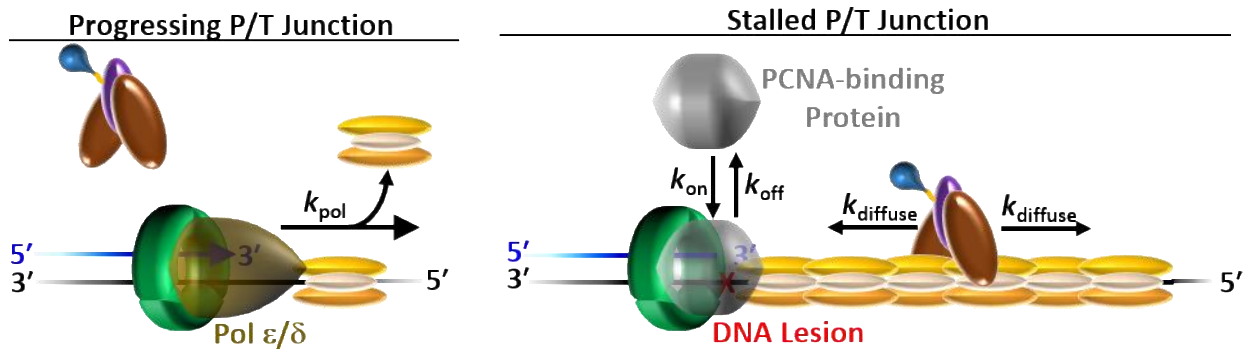

583

584 **Figure 3. RPA interacts with Rad18 to regulate PCNA monoubiquitination.** (*Left*) The short

585 RPA filaments adjacent to progressing P/T junctions are rapidly displaced by the replicative pols

586  $\epsilon$  and  $\delta$ . Here, interactions of Rad18 with RPA and PCNA on ssDNA are prohibited and

587 Rad6/Rad18 complexes remain disengaged. (*Right*). The long, persistent RPA filaments

588 generated at P/T junctions stalled at DNA lesions promote Rad18•RPA interactions and localize

589 a Rad6/Rad18 complex to stalled P/T junctions independently of PCNA binding. Once engaged,

590 the Rad6/Rad18 complex translocates randomly along the RPA filament by thermal-driven

591 diffusion. These movements selectively elevate the relative frequency of collisions between the

592 loaded PCNA target and the Rad6/Rad18 complex. Together, these Rad18•interactions promote

593 monoubiquitination of PCNA encircling stalled P/T junction.

594

595

596

597

598

599

600

601

602

603 **Table 1.** Kinetics obtained from transient state kinetic assays reveal a critical role for RPA in

604 monoubiquitination of PCNA by the Rad6/Rad18 complex

|              | Substrate                    | BioP/T-33ss*        | BioP/T-171ss        | BioP/T-33ss + 138ss  |
|--------------|------------------------------|---------------------|---------------------|----------------------|
| Experimental | # of RPA bound to ssDNA      | 1                   | 6                   | 6                    |
| Condition    | # of RPA next to PCNA        | 1                   | 6                   | 1                    |
| Kinetic      | $A_0$ , unitless             | $0.0967 \pm 0.0228$ | $0.616 \pm 0.033$   | $0.0548 \pm 0.0081$  |
| Variables    | $v_{ss}$ , $\text{min}^{-1}$ | $0.0243 \pm 0.0015$ | $0.0498 \pm 0.0019$ | $0.0169 \pm 0.00056$ |

605 \* = Reference conditions

606

607
